# Supplementary material for: Genomic Selection in Commercial Perennial Crops: Applicability and Improvement in Oil Palm (Elaeis guineensis Jacq.)
Source: PubMed Central journal article supplement (PMC5460275; doi:10.1038/s41598-017-02602-6), 2017-06-06

## Supplementary information - Nature Scientific Reports

# Genomic Selection in Commercial Perennial Crops: Applicability and Improvement in Oil Palm (*Elaeis guineensis* Jacq.)

Qi Bin Kwong<sup>1\*</sup>, Ai Ling Ong<sup>1</sup>, Chee Keng Teh<sup>1</sup>, Fook Tim Chew<sup>2</sup>, Martti Tammi<sup>1</sup>, Sean Mayes<sup>3</sup>, Harikrishna Kulaveerasingam<sup>1</sup>, Suat Hui Yeoh<sup>4</sup>, Jennifer Ann Harikrishna<sup>4,5\*\*</sup>¶, David Ross Appleton<sup>1¶</sup>

<sup>1</sup> Biotechnology & Breeding Department, Sime Darby Plantation R&D Centre, Selangor, 43400, Malaysia

<sup>2</sup> Department of Biological Sciences, National University of Singapore, 117543, Singapore

<sup>3</sup> School of Biosciences, University of Nottingham, Sutton Bonington Campus, Loughborough, LE12 5RD, UK

<sup>4</sup> Institute of Biological Sciences, University Malaya, 50603, Kuala Lumpur, Malaysia

<sup>5</sup> Centre of Research in Biotechnology for Agriculture (CEBAR), University Malaya, 50603, Kuala Lumpur, Malaysia

\* Correspondence: Qi Bin Kwong (kwong.qi.bin.@simedarby.com)

Jennifer Ann Harikrishna (jennihari@um.edu.my)

**Supplementary Table 1.** Selection gain estimated from all traits in study with selection threshold set as 25%.

|                        | M/F   | *S/F    | K/F    | F/B   | O/M   | O/B   | O/P    |
|------------------------|-------|---------|--------|-------|-------|-------|--------|
| Selection response (%) | 4.95% | -17.91% | 24.79% | 4.49% | 4.72% | 6.68% | 14.65% |

\* Oil palm breeding aims to reduce S/F, and increase other yield traits.

**Supplementary Table 2.** Marker reduction by association for 4 traits.

*(Refer to separate spreadsheet – Supplementary Table 2.xlsx)*

**Supplementary Table 3.** Markers filtered by LD and the corresponding prediction accuracy for ascending number of markers for the traits of M/F and O/P.

| Number of markers | O/P without LD filter | O/P with LD filter | M/F without LD filter | M/F with LD Filter |
|-------------------|-----------------------|--------------------|-----------------------|--------------------|
| 10                | 0.1684                | 0.2278             | 0.2965                | 0.3033             |
| 20                | 0.2700                | 0.2988             | 0.2789                | 0.3801             |
| 30                | 0.3270                | 0.3218             | 0.2800                | 0.4205             |
| 40                | 0.3321                | 0.3573             | 0.2740                | 0.4336             |
| 50                | 0.3426                | 0.3804             | 0.3078                | 0.4743             |
| 60                | 0.3883                | 0.3862             | 0.3887                | 0.5006             |
| 70                | 0.3970                | 0.3950             | 0.4045                | 0.5291             |
| 80                | 0.4218                | 0.4033             | 0.4109                | 0.5425             |
| 90                | 0.4255                | 0.4053             | 0.4473                | 0.5562             |
| 100               | 0.4260                | 0.4156             | 0.4494                | 0.5785             |
| 110               | 0.4280                | 0.4283             | 0.4545                | 0.5908             |
| 120               | 0.4344                | 0.4434             | 0.4443                | 0.5987             |
| 130               | 0.4403                | 0.4432             | 0.5386                | 0.6087             |
| 140               | 0.4426                | 0.4457             | 0.5594                | 0.6065             |
| 150               | 0.4483                | 0.4427             | 0.5709                | 0.6109             |
| 160               | 0.4571                | 0.4451             | 0.5705                | 0.6175             |
| 170               | 0.4674                | 0.4432             | 0.5721                | 0.6247             |
| 180               | 0.4761                | 0.4433             | 0.5736                | 0.6277             |
| 190               | 0.4821                | 0.4418             | 0.5755                | 0.6338             |
| 200               | 0.4813                | 0.4496             | 0.6250                | 0.6321             |
| 210               | 0.4774                | 0.4522             | 0.6439                | 0.6353             |
| 220               | 0.4794                | 0.4582             | 0.6521                | 0.6355             |
| 230               | 0.4768                | 0.4583             | 0.6432                | 0.6384             |

|     |        |        |        |        |
|-----|--------|--------|--------|--------|
| 240 | 0.4534 | 0.4567 | 0.6465 | 0.6419 |
| 250 | 0.4560 | 0.4596 | 0.6446 | 0.6419 |
| 260 | 0.4619 | 0.4625 | 0.6521 | 0.6435 |
| 270 | 0.4673 | 0.4656 | 0.6523 | 0.6423 |
| 280 | 0.4662 | 0.4688 | 0.6560 | 0.6461 |
| 290 | 0.4666 | 0.4689 | 0.6586 | 0.6449 |
| 300 | 0.4655 | 0.4699 | 0.6645 | 0.6480 |

**Supplementary Figure 1.** The distribution of kinship coefficients of 1,218 *tenera* palms.

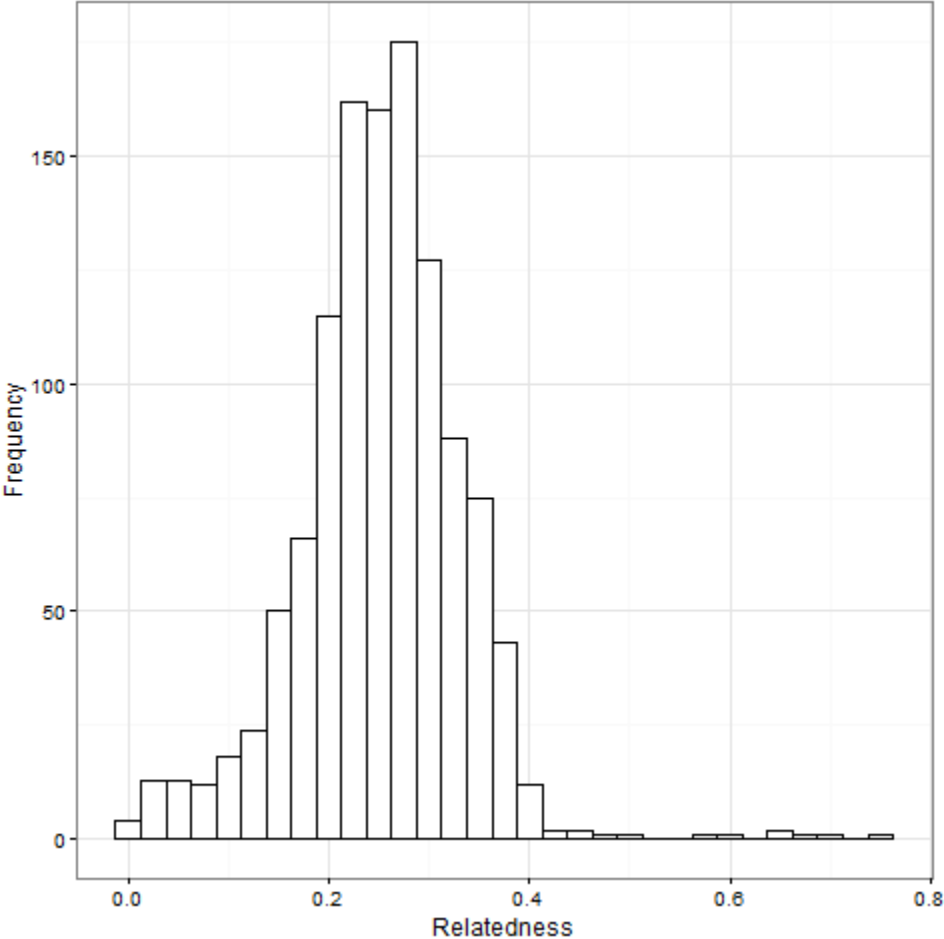

**Supplementary Figure 2.** Correlation between genomic heritability calculated from full marker set against marker subset.

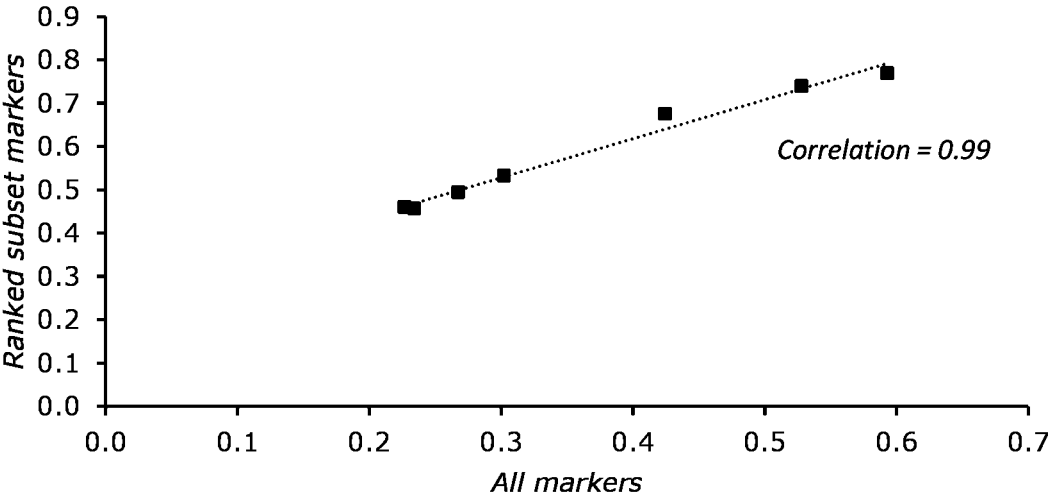

Supplement: 41598_2017_2602_MOESM2_ESM.pdf [file 41598_2017_2602_MOESM2_ESM.pdf]
